# Supplementary material
Source: PubMed Central journal article supplement (PMC8759010)

**Comparative Compositions of Metabolites and Dietary Fibre Components in Doughs and Breads Produced from Bread Wheat, Emmer and Spelt and using Yeast and Sourdough Processes**

**Supporting Material**

**Table S1.** Recipes and conditions used to make the yeast and sourdough breads.  
\*the energy for mixing and kneading reflects the strength of the doughs.

**WHEAT YEAST BREAD**

| <b>ingredients</b> | <b>%</b> | <b>Weight (g)</b> |
|--------------------|----------|-------------------|
| Wheat flour        | 100      | 3500              |
| Yeast IDY          | 0,6      | 21                |
| Salt (with iodine) | 1,5      | 52,5              |
| Sugar              | 1        | 35                |
| Sunflower oil      | 2        | 70                |
| Water              | 80       | 2870              |

| <b>conditions</b>               |                          | <b>units</b> |
|---------------------------------|--------------------------|--------------|
| Flour temperature               | 23                       | °C           |
| Water temperature / ice water   | 2                        | °C           |
| Mixing                          | 3                        | minutes      |
| Rest 30 minutes, autolyse       |                          |              |
| Mixing                          | 3                        | minutes      |
| Kneading, 2 <sup>nd</sup> speed | circa 10                 | minutes      |
| Energy for mixing and kneading* | 393                      | KJ           |
| Dough temperature               | 25                       | °C           |
| Dough assessment                | elastic/ slightly sticky |              |
| Bulk fermentation               | 45                       | minutes      |

|                               |                  |         |
|-------------------------------|------------------|---------|
| Temperature bulk fermentation | 27               | °C      |
| Scale                         | 870              | gram    |
| Modelling                     | equal/ 28 cm     |         |
| Dough assessment              | flexible/ liquid |         |
| Final proof                   | 30               | °C      |
| Time                          | 70               | minutes |
| Baking program WOW 10         | 235 / 255        | °C      |
| Total baking time             | 38               | minutes |
| Cooling down                  | 1                | hrs     |

#### **SPELT YEAST BREAD**

| <b>ingredients</b> | <b>%</b> | <b>Weight (g)</b> |
|--------------------|----------|-------------------|
| Spelt flour        | 100      | 3500              |
| Yeast IDY          | 0,6      | 21                |
| Salt (with iodine) | 1,5      | 52.5              |
| Sugar              | 1        | 35                |
| Sunflour oil       | 2        | 70                |
| Water              | 73       | 2555              |

| <b>conditions</b>               |          | <b>units</b> |
|---------------------------------|----------|--------------|
| Flour temperature               | 23       | °C           |
| Water temperature / ice water   | 2        | °C           |
| Mixing                          | 3        | minutes      |
| Rest 30 minutes, autolyse       |          |              |
| Mixing                          | 3        | minutes      |
| Kneading, 2nd speed             | circa 10 | minutes      |
| Energy for mixing and kneading* | 393      | KJ           |

|                               |                  |         |
|-------------------------------|------------------|---------|
| Dough temperature             | 25               | °C      |
| Dough assessment              | elastic/ sticky  |         |
| Bulk fermentation             | 45               | minutes |
| Temperature bulk fermentation | 27               | °C      |
| Scale                         | 870              | gram    |
| Modelling                     | equal/ 28 cm     |         |
| Dough assessment              | flexible/ liquid |         |
| Final proof                   | 30               | °C      |
| Time                          | 70               | minutes |
| Baking program WOW 10         | 235 / 255        | °C      |
| Total baking time             | 38               | minutes |
| Cooling down                  | 1                | hrs     |

#### **EMMER YEAST BREAD**

| <b>ingredients</b> | <b>%</b> | <b>Weight (g)</b> |
|--------------------|----------|-------------------|
|                    |          |                   |
| Emmer flour        | 100      | 3500              |
| Yeast IDY          | 0,8      | 28                |
| Salt (with iodine) | 1,5      | 52,5              |
| Sugar              | 1        | 35                |
| Sunflower oil      | 2        | 70                |
| Water              | 70       | 2450              |

| <b>conditions</b>             | <b>units</b> |         |
|-------------------------------|--------------|---------|
| Flour temperature             | 23           | °C      |
| Water temperature / ice water | 2            | °C      |
| Mixing                        | 3            | minutes |
| Rest 30 minutes, autolyse     |              |         |

|                                 |                       |         |
|---------------------------------|-----------------------|---------|
| Mixing                          | 3                     | minutes |
| Kneading, 2nd speed             | circa 10              | minutes |
| Energy for mixing and kneading* | 377                   | KJ      |
| Dough temperature               | 25                    | °C      |
| Dough assessment                | elastic/ liquid       |         |
| Bulk fermentation               | 45                    | minutes |
| Temperature bulk fermentation   | 27                    | °C      |
| Scale                           | 900                   | gram    |
| Modelling                       | equal/ 28 cm          |         |
| Dough assessment                | flexible/ very liquid |         |
| Final proof                     | 30                    | °C      |
| Time                            | 70                    | minutes |
| Baking program WOW 10           | 235 / 255             | °C      |
| Total baking time               | 37                    | minutes |
| Cooling down                    | 1                     | hrs     |

#### WHEAT SOURDOUGH BREAD

| ingredients        | %    | Weight (g) |
|--------------------|------|------------|
| Wheat flour        | 100  | 3500       |
| Wheat sourdough    | 20   | 700        |
| Salt (with iodine) | 1,5  | 57,8       |
| Sugar              | 1    | 38,5       |
| Sunflower oil      | 2    | 77         |
| Water              | 72,7 | 2450       |

| Conditions        | units |    |
|-------------------|-------|----|
| Flour temperature | 23    | °C |

|                                 |                   |         |
|---------------------------------|-------------------|---------|
| Sourdough temperature           | 25                | °C      |
| Water temperature               |                   | °C      |
| Mixing                          | 1                 | minute  |
| Kneading, only slow speed       | 15                | minute  |
| Energy for mixing and kneading* | 421,09            | KJ      |
| Dough temperature               | 26                | °C      |
| Dough assessment                | elastic/ flexible |         |
| Bulk fermentation               | 15                | hrs     |
| Temperature bulk fermentation   | 5                 | °C      |
| Controlled Dough Climate        | 4                 | hrs     |
| Dough acclimatize until         | 16                | °C      |
| Scale                           | 900               | gram    |
| Modelling                       | equal/ 28 cm      |         |
| Dough assessment                | flexible/ tension |         |
| Final proof                     | 27                | °C      |
| Time                            | 4                 | hrs     |
| Baking program WOW 11 SD        | 235 / 255         | °C      |
| after 10 minutes                | 225 / 235         | °C      |
| Total baking time               | 37                | minutes |
| Cooling down                    | 1                 | hrs     |

#### **SPELT SOURDOUGH BREAD**

| <b>ingredients</b> | <b>%</b> | <b>Weight (g)</b> |
|--------------------|----------|-------------------|
|                    |          |                   |
| Spelt flour        | 100      | 3500              |
| Spelt sourdough    | 20       | 700               |
| Salt (with iodine) | 1,5      | 57,8              |
| Sugar              | 1        | 38,5              |

|              |      |      |
|--------------|------|------|
| Sunflour oil | 2    | 77   |
| Water        | 72,7 | 2450 |

| <b>Conditions</b>               |                   | <b>units</b> |
|---------------------------------|-------------------|--------------|
| Flour temperature               | 23                | °C           |
| Sourdough temperature           | 25                | °C           |
| Water temperature               | 6-8               | °C           |
| Mixing                          | 1                 | minute       |
| Kneading, only slow speed       | 15                | minute       |
| Energy for mixing and kneading* | 421,09            | KJ           |
| Dough temperature               | 26                | °C           |
| Dough assessment                | elastic/ flexible |              |
| Bulk fermentation               | 15                | hrs          |
| Temperature bulk fermentation   | 5                 | °C           |
| Controlled Dough Climate        | 4                 | hrs          |
| Dough acclimatize until         | 16                | °C           |
| Scale                           | 900               | gram         |
| Modelling                       | equal/ 28 cm      |              |
| Dough assessment                | flexible/ tension |              |
| Final proof                     | 27                | °C           |
| Time                            | 4                 | hrs          |
| Baking program WOW 11 SD        | 235 / 255         | °C           |
| after 10 minutes                | 225 / 235         | °C           |
| Total baking time               | 37                | minutes      |
| Cooling down                    | 1                 | hrs          |

#### **EMMER SOURDOUGH BREAD**

| <b>ingredients</b> | <b>%</b> | <b>Weight (g)</b> |
|--------------------|----------|-------------------|
|                    |          |                   |

|                    |      |      |
|--------------------|------|------|
| Emmer flour        | 100  | 3500 |
| Emmer sourdough    | 20   | 700  |
| Salt (with iodine) | 1,5  | 57,8 |
| Sugar              | 1    | 38,5 |
| Sunflower oil      | 2    | 77   |
| Water              | 72,7 | 2450 |

| <b>Conditions</b>               |                   | <b>units</b> |
|---------------------------------|-------------------|--------------|
| Flour temperature               | 23                | °C           |
| Sourdough temperature           | 25                | °C           |
| Water temperature               | 6-8               | °C           |
| Mixing                          | 1                 | minute       |
| Kneading, only slow speed       | 15                | minute       |
| Energy for mixing and kneading* | 419               | KJ           |
| Dough temperature               | 26                | °C           |
| Dough assessment                | elastic/ flexible |              |
| Bulk fermentation               | 15                | hrs          |
| Temperature bulk fermentation   | 5                 | °C           |
| Controlled Dough Climate        | 4                 | hrs          |
| Dough acclimatize until         | 16                | °C           |
| Scale                           | 900               | gram         |
| Modelling                       | equal/ 28 cm      |              |
| Dough assessment                | flexible/ tension |              |
| Final proof                     | 27                | °C           |
| Time                            | 4                 | hrs          |
| Baking program WOW 11 SD        | 235 / 255         | °C           |

|                   |           |         |
|-------------------|-----------|---------|
| after 10 minutes  | 225 / 235 | °C      |
| Total baking time | 37        | minutes |
| Cooling down      | 1         | hrs     |

**Supplementary Table S2.** Preparation of sourdough starter.

|          |                        |     |         |                            |
|----------|------------------------|-----|---------|----------------------------|
| <b>A</b> | <b>Start sourdough</b> | 50  | gram    | Maillander Le Chef starter |
|          |                        | 250 | gram    | Wholemeal flour            |
|          |                        | 250 | gram    | Water 25°C                 |
|          | start up phase         |     | 17hours | 25°C                       |
| <b>B</b> | <b>sourdough</b>       | 500 | gram    | Sourdough starter (step A) |
|          |                        | 500 | gram    | Wholemeal flour            |
|          |                        | 500 | gram    | Water 25°C                 |
|          | restart phase          |     | 4hours  | 25°C                       |
| <b>C</b> | <b>sourdough</b>       | 500 | gram    | Sourdough starter (step B) |
|          |                        | 500 | gram    | Wholemeal flour            |
|          |                        | 500 | gram    | Water 25°C                 |
|          | restart phase          |     | 4hours  | 25°C                       |

**Supplementary Table S3.** P values (A) and Tables of means (B) from ANOVA of contents of polar metabolites in flour, dough and bread of the three types of wheat.

Some variables required transformation (square root or  $\log_e$ ) to meet the assumptions of the analysis. Where this is the case it has been indicated in the tables. Further details are given in Statistical Analyses section.

#### **A. P values for individual components**

Statistically significant values ( $p < 0.05$ ) are in bold.



|                           | Processed<br>cf flour vs dough or bread | type.processed   | processed.dough  | type.processed.dough | processed.stage  | type.processed.stage | processed.stage.dough | type.processed.stage.dough |
|---------------------------|-----------------------------------------|------------------|------------------|----------------------|------------------|----------------------|-----------------------|----------------------------|
| <b>Metabolites by NMR</b> |                                         |                  |                  |                      |                  |                      |                       |                            |
| Adenosine                 | <b>0.002</b>                            | <b>0.024</b>     | <b>&lt;0.001</b> | <b>0.015</b>         | 0.319            | 0.117                | <b>0.041</b>          | <b>0.028</b>               |
| Trigonelline              | 0.082                                   | <b>0.003</b>     | 0.912            | <b>0.004</b>         | <b>0.03</b>      | 0.181                | <b>0.003</b>          | <b>0.019</b>               |
| Tryptophan                | 0.234                                   | <b>0.012</b>     | <b>&lt;0.001</b> | <b>0.048</b>         | <b>0.002</b>     | 0.517                | <b>0.007</b>          | <b>0.027</b>               |
| Tyrosine                  | 0.127                                   | <b>0.041</b>     | <b>&lt;0.001</b> | <b>0.021</b>         | <b>&lt;0.001</b> | 0.804                | 0.068                 | <b>0.045</b>               |
| Fumarate                  | 0.681                                   | 0.059            | <b>&lt;0.001</b> | <b>0.004</b>         | 0.28             | 0.359                | <b>0.014</b>          | 0.135                      |
| Raffinose                 | <b>&lt;0.001</b>                        | <b>&lt;0.001</b> | <b>&lt;0.001</b> | <b>0.041</b>         | <b>&lt;0.001</b> | 0.722                | 0.193                 | <b>0.006</b>               |
| Sucrose                   | <b>&lt;0.001</b>                        | <b>&lt;0.001</b> | <b>0.003</b>     | <b>0.015</b>         | <b>&lt;0.001</b> | 0.456                | <b>&lt;0.001</b>      | <b>0.016</b>               |
| log Maltose               | <b>&lt;0.001</b>                        | <b>&lt;0.001</b> | <b>&lt;0.001</b> | <b>&lt;0.001</b>     | <b>&lt;0.001</b> | <b>0.001</b>         | <b>&lt;0.001</b>      | 0.11                       |
| Alpha-Glucose/Maltose     | <b>&lt;0.001</b>                        | <b>&lt;0.001</b> | <b>&lt;0.001</b> | <b>&lt;0.001</b>     | <b>0.002</b>     | 0.32                 | <b>&lt;0.001</b>      | 0.242                      |
| log beta-Glucose          | <b>&lt;0.001</b>                        | 0.074            | <b>&lt;0.001</b> | 0.407                | <b>&lt;0.001</b> | 0.139                | 0.183                 | <b>0.02</b>                |
| log beta-Arabinose        | <b>&lt;0.001</b>                        | <b>0.022</b>     | <b>&lt;0.001</b> | <b>0.009</b>         | <b>&lt;0.001</b> | 0.396                | <b>0.041</b>          | 0.087                      |
| Trehalose                 | <b>&lt;0.001</b>                        | <b>0.01</b>      | <b>&lt;0.001</b> | <b>0.001</b>         | <b>&lt;0.001</b> | 0.416                | <b>&lt;0.001</b>      | 0.104                      |
| sqrt Fructose             | <b>&lt;0.001</b>                        | <b>&lt;0.001</b> | 0.342            | <b>0.002</b>         | <b>&lt;0.001</b> | 0.151                | <b>&lt;0.001</b>      | <b>0.03</b>                |
| sqrt Mannitol             | <b>&lt;0.001</b>                        | <b>&lt;0.001</b> | <b>&lt;0.001</b> | 0.064                | <b>&lt;0.001</b> | 0.588                | <b>&lt;0.001</b>      | 0.066                      |
| Glycerol                  | <b>0.01</b>                             | <b>&lt;0.001</b> | 0.17             | 0.065                | <b>&lt;0.001</b> | 0.445                | <b>&lt;0.001</b>      | 0.889                      |
| sqrt Lactic acid          | <b>&lt;0.001</b>                        | <b>&lt;0.001</b> | <b>&lt;0.001</b> | <b>&lt;0.001</b>     | <b>&lt;0.001</b> | <b>0.001</b>         | <b>&lt;0.001</b>      | <b>&lt;0.001</b>           |
| sqrt Succinic acid        | <b>&lt;0.001</b>                        | 0.08             | <b>&lt;0.001</b> | <b>0.001</b>         | <b>&lt;0.001</b> | 0.413                | 0.909                 | 0.987                      |
| Malic acid                | 0.11                                    | 0.74             | 0.323            | <b>0.034</b>         | 0.97             | <b>0.028</b>         | 0.838                 | <b>0.006</b>               |
| Phenylalanine             | <b>&lt;0.001</b>                        | <b>0.002</b>     | <b>&lt;0.001</b> | <b>&lt;0.001</b>     | <b>0.001</b>     | 0.699                | <b>0.066</b>          | <b>0.016</b>               |

|                     |                  |                  |                  |                  |                  |              |                  |              |
|---------------------|------------------|------------------|------------------|------------------|------------------|--------------|------------------|--------------|
| log Alanine         | <b>&lt;0.001</b> | <b>&lt;0.001</b> | <b>&lt;0.001</b> | <b>&lt;0.001</b> | <b>&lt;0.001</b> | <b>0.006</b> | <b>&lt;0.001</b> | <b>0.039</b> |
| sqrt Asparagine     | <b>0.01</b>      | 0.644            | <b>&lt;0.001</b> | <b>0.03</b>      | <b>&lt;0.001</b> | 0.837        | <b>0.025</b>     | 0.093        |
| sqrt Aspartate      | <b>0.001</b>     | 0.055            | <b>&lt;0.001</b> | <b>0.002</b>     | <b>&lt;0.001</b> | 0.755        | <b>0.002</b>     | 0.244        |
| sqrt GABA           | <b>&lt;0.001</b> | <b>0.038</b>     | <b>&lt;0.001</b> | 0.165            | <b>&lt;0.001</b> | 0.765        | 0.075            | 0.395        |
| Glutamate           | <b>&lt;0.001</b> | <b>&lt;0.001</b> | <b>&lt;0.001</b> | <b>&lt;0.001</b> | <b>&lt;0.001</b> | 0.723        | 0.385            | 0.805        |
| Glutamine           | <b>&lt;0.001</b> | 0.053            | <b>&lt;0.001</b> | <b>0.014</b>     | <b>&lt;0.001</b> | 0.494        | <b>0.004</b>     | 0.145        |
| Methionine          | <b>&lt;0.001</b> | <b>0.009</b>     | <b>&lt;0.001</b> | <b>&lt;0.001</b> | <b>&lt;0.001</b> | <b>0.002</b> | <b>&lt;0.001</b> | 0.139        |
| Leucine             | <b>&lt;0.001</b> | <b>&lt;0.001</b> | <b>&lt;0.001</b> | <b>&lt;0.001</b> | <b>&lt;0.001</b> | 0.604        | <b>0.048</b>     | 0.773        |
| sqrt Isoleucine     | <b>&lt;0.001</b> | <b>0.012</b>     | <b>&lt;0.001</b> | <b>0.039</b>     | <b>&lt;0.001</b> | 0.571        | <b>0.003</b>     | 0.642        |
| sqrt Valine         | <b>&lt;0.001</b> | <b>0.04</b>      | <b>&lt;0.001</b> | <b>0.05</b>      | <b>&lt;0.001</b> | 0.135        | 0.687            | 0.79         |
| Glycine betaine     | <b>&lt;0.001</b> | <b>0.001</b>     | <b>&lt;0.001</b> | <b>&lt;0.001</b> | 0.1              | 0.687        | <b>&lt;0.001</b> | 0.43         |
| Choline             | <b>&lt;0.001</b> | 0.643            | <b>0.004</b>     | 0.581            | 0.572            | 0.303        | 0.152            | <b>0.040</b> |
| log Choline sulfate | <b>0.004</b>     | 0.691            | 0.689            | 0.204            | 0.101            | 0.691        | 0.25             | 0.606        |

**B. Table of means for components (mg/g dry wt)**

|       |                 | Total FODMAPs | Total amino acids | Sqrt total organic acids | Log total sugars | Total methyl donors |
|-------|-----------------|---------------|-------------------|--------------------------|------------------|---------------------|
| Emmer | wholemeal       | 46.22         | 11.73             | 1.903                    | 4.105            | 5.772               |
|       | sourdough bread | 65.68         | 18.41             | 5.454                    | 5.125            | 8.107               |
|       | sourdough dough | 64.2          | 23.40             | 5.361                    | 5.202            | 8.741               |
|       | Yeast bread     | 43.89         | 8.36              | 1.993                    | 5.194            | 7.752               |
|       | Yeast dough     | 35.64         | 12.70             | 2.195                    | 4.926            | 7.509               |
| Spelt | wholemeal       | 45.31         | 10.97             | 1.921                    | 3.940            | 6.529               |
|       | sourdough bread | 60.19         | 19.05             | 5.509                    | 4.797            | 8.722               |
|       | sourdough dough | 59.46         | 25.06             | 5.569                    | 4.837            | 9.496               |
|       | Yeast bread     | 41.43         | 9.71              | 2.217                    | 4.998            | 7.960               |



|     |  |         |         |         |         |         |        |
|-----|--|---------|---------|---------|---------|---------|--------|
| SEM |  | 0.04572 | 0.02262 | 0.05112 | 0.01717 | 0.01066 | 0.1612 |
|-----|--|---------|---------|---------|---------|---------|--------|

|       |                 | Sucrose | Log Maltose | Alpha-glucose and maltose | Log beta-glucose | Log beta-arabinose | Trehalose |
|-------|-----------------|---------|-------------|---------------------------|------------------|--------------------|-----------|
| Emmer | wholemeal       | 20.93   | 2.945       | 3.87                      | 0.398            | -1.2176            | 0.728     |
|       | sourdough bread | 8.39    | 4.435       | 18.50                     | 2.199            | -0.6032            | 2.347     |
|       | sourdough dough | 8.33    | 4.523       | 22.72                     | 2.261            | -0.4502            | 2.417     |
|       | yeast bread     | 10.25   | 4.601       | 17.03                     | 1.063            | -1.1522            | 2.401     |
|       | Yeast dough     | 6.78    | 4.274       | 14.66                     | 1.218            | -1.0219            | 1.867     |
| Spelt | wholemeal       | 18.58   | 2.655       | 3.09                      | 0.268            | -1.2697            | 0.576     |
|       | sourdough bread | 9.31    | 3.889       | 12.52                     | 2.182            | -0.3613            | 2.605     |
|       | sourdough dough | 8.78    | 3.932       | 16.19                     | 2.297            | -0.3278            | 2.577     |
|       | yeast bread     | 9.36    | 4.22        | 13.24                     | 1.248            | -1.0376            | 2.271     |
|       | yeast dough     | 6.67    | 3.830       | 10.35                     | 1.239            | -0.9158            | 1.591     |
| Wheat | wholemeal       | 17.41   | 2.650       | 3.10                      | 0.286            | -1.3622            | 0.615     |
|       | sourdough bread | 9.66    | 3.843       | 11.34                     | 2.059            | -0.5562            | 2.146     |
|       | sourdough dough | 8.65    | 3.842       | 14.55                     | 2.231            | -0.5323            | 2.018     |
|       | yeast bread     | 9.14    | 4.190       | 11.31                     | 1.055            | -1.0793            | 1.968     |
|       | yeast dough     | 7.71    | 3.710       | 9.06                      | 1.135            | -0.7920            | 1.596     |
|       |                 |         |             |                           |                  |                    |           |
| SEM   |                 | 0.3060  | 0.01844     | 0.2558                    | 0.02490          | 0.04155            | 0.06753   |

|       |           | Sqrt Fructose | Sqrt Mannitol | Glycerol | Sqrt Lactic acid | Sqrt Succinic acid | Malic acid |
|-------|-----------|---------------|---------------|----------|------------------|--------------------|------------|
| Emmer | wholemeal | 3.784         | 5.271         | 10.91    | 0.727            | 0.4442             | 2.747      |

|       |                 |         |         |        |         |         |        |
|-------|-----------------|---------|---------|--------|---------|---------|--------|
|       | sourdough bread | 6.705   | 6.717   | 16.72  | 4.858   | 0.9953  | 5.081  |
|       | sourdough dough | 6.768   | 6.647   | 16.17  | 4.870   | 1.0433  | 3.839  |
|       | Yeast bread     | 6.914   | 4.768   | 17.67  | 0.893   | 0.5048  | 2.771  |
|       | Teast dough     | 6.239   | 4.388   | 13.97  | 1.197   | 0.5557  | 2.915  |
| Spelt | wholemeal       | 3.652   | 4.973   | 12.57  | 0.714   | 0.4584  | 2.835  |
|       | sourdough bread | 6.188   | 6.736   | 10.81  | 5.092   | 1.0829  | 3.121  |
|       | sourdough dough | 6.075   | 6.708   | 10.78  | 5.112   | 1.1201  | 3.527  |
|       | yeast bread     | 6.639   | 4.946   | 13.95  | 0.901   | 0.5691  | 3.629  |
|       | yeast dough     | 5.861   | 4.390   | 10.50  | 1.342   | 0.6049  | 3.534  |
| Wheat | wholemeal       | 3.550   | 4.3967  | 12.02  | 0.701   | 0.4705  | 3.337  |
|       | sourdough bread | 5.900   | 6.501   | 10.86  | 4.751   | 0.9894  | 2.912  |
|       | sourdough dough | 5.553   | 6.292   | 10.80  | 4.563   | 1.0148  | 3.844  |
|       | yeast bread     | 6.154   | 4.599   | 12.96  | 0.825   | 0.5827  | 3.852  |
|       | yeast dough     | 5.554   | 4.233   | 9.90   | 1.213   | 0.6113  | 3.736  |
|       |                 |         |         |        |         |         |        |
| SEM   |                 | 0.06004 | 0.05035 | 0.3115 | 0.01855 | 0.01160 | 0.2245 |

|       |                  | Phenylalanine | Log Alanine | Sqrt Asparagine | Sqrt Aspartate | Sqrt GABA | glutamate |
|-------|------------------|---------------|-------------|-----------------|----------------|-----------|-----------|
| Emmer | wholemeal        | 0.2991        | -1.1292     | 0.9562          | 1.047          | 0.6184    | 4.380     |
|       | sourdough bread  | 0.3424        | -0.6027     | 1.0156          | 1.312          | 1.0568    | 6.766     |
|       | sourdough dough  | 0.4327        | -0.4315     | 1.2147          | 1.484          | 1.1969    | 8.564     |
|       | yeastdough bread | 0.2009        | -1.1437     | 0.4391          | 0.716          | 0.7255    | 3.483     |
|       | yeastdough dough | 0.2339        | -0.9308     | 0.6603          | 0.838          | 0.8651    | 5.245     |
| Spelt | wholemeal        | 0.2196        | -1.1678     | 0.9987          | 1.084          | 0.6323    | 3.903     |
|       | sourdough bread  | 0.4624        | -0.5791     | 0.9764          | 1.322          | 1.0003    | 7.136     |

|       |                 |           |            |         |                 |             |                 |
|-------|-----------------|-----------|------------|---------|-----------------|-------------|-----------------|
|       | sourdough dough | 0.4859    | -0.3740    | 1.2816  | 1.569           | 1.1963      | 9.073           |
|       | yeast bread     | 0.1790    | -1.0839    | 0.6718  | 0.951           | 0.7699      | 3.800           |
|       | yeast dough     | 0.2482    | -0.7825    | 0.8333  | 1.029           | 0.8913      | 5.657           |
| Wheat | wholemeal       | 0.2029    | -1.2661    | 0.8219  | 0.995           | 0.5791      | 3.581           |
|       | sourdough bread | 0.3787    | -0.7759    | 0.7541  | 1.158           | 0.8729      | 5.675           |
|       | sourdough dough | 0.3609    | -0.5766    | 1.1638  | 1.420           | 1.0913      | 7.583           |
|       | yeast bread     | 0.2109    | -1.4249    | 0.4790  | 0.725           | 0.6118      | 3.103           |
|       | yeast dough     | 0.3833    | -1.0381    | 0.5734  | 0.815           | 0.7270      | 4.774           |
|       |                 |           |            |         |                 |             |                 |
| SEM   |                 | 0.02551   | 0.01777    | 0.04941 | 0.02768         | 0.02645     | 0.1127          |
|       |                 | Glutamine | Methionine | Leucine | Sqrt Isoleucine | Sqrt Valine | Glycine betaine |
| Emmer | wholemeal       | 0.5791    | 0.5340     | 1.363   | 0.5569          | 0.5171      | 2.612           |
|       | sourdough bread | 0.8868    | 1.3411     | 2.704   | 0.6262          | 0.5763      | 3.726           |
|       | sourdough dough | 1.2448    | 1.3392     | 3.500   | 0.8060          | 0.7417      | 4.062           |
|       | yeast bread     | 0.4118    | 0.4876     | 1.041   | 0.3384          | 0.3533      | 3.390           |
|       | yeast dough     | 0.7393    | 0.8275     | 1.712   | 0.5544          | 0.5340      | 3.233           |
| Spelt | wholemeal       | 0.5675    | 0.4804     | 1.210   | 0.5463          | 0.5134      | 2.976           |
|       | sourdough bread | 0.8896    | 1.2285     | 2.767   | 0.6636          | 0.5866      | 3.821           |
|       | sourdough dough | 1.3550    | 1.4418     | 3.616   | 0.8421          | 0.7767      | 4.206           |
|       | yeast bread     | 0.5030    | 0.5304     | 1.076   | 0.3878          | 0.4048      | 3.759           |
|       | yeast dough     | 0.8281    | 0.9587     | 1.786   | 0.6005          | 0.5867      | 3.473           |
| Wheat | wholemeal       | 0.5483    | 0.4502     | 1.140   | 0.5209          | 0.5033      | 2.270           |
|       | sourdough bread | 0.7147    | 1.0364     | 2.191   | 0.5753          | 0.5229      | 2.960           |
|       | sourdough dough | 1.2067    | 1.1398     | 3.012   | 0.7559          | 0.7292      | 3.234           |
|       | yeast bread     | 0.4536    | 0.4586     | 0.854   | 0.3169          | 0.3406      | 2.961           |
|       | yeast dough     | 0.7254    | 0.7859     | 1.617   | 0.5559          | 0.5580      | 2.736           |

|     |  |         |         |         |          |         |         |
|-----|--|---------|---------|---------|----------|---------|---------|
|     |  |         |         |         |          |         |         |
| SEM |  | 0.03154 | 0.02316 | 0.04219 | 0.009942 | 0.01282 | 0.05286 |

|       |                 | Choline | Log<br>Choline<br>sulphate | Log<br>Acetate |
|-------|-----------------|---------|----------------------------|----------------|
| Emmer | wholemeal       | 0.716   | 0.841                      | -2.356         |
|       | sourdough bread | 1.429   | 1.063                      | 0.430          |
|       | sourdough dough | 1.219   | 1.214                      | 0.483          |
|       | yeast bread     | 1.097   | 1.183                      | -1.277         |
|       | Yeast dough     | 1.213   | 1.122                      | -1.253         |
| Spelt | wholemeal       | 0.583   | 1.088                      | -2.295         |
|       | sourdough bread | 1.303   | 1.276                      | 0.448          |
|       | sourdough dough | 1.217   | 1.404                      | 0.514          |
|       | Yeast bread     | 1.184   | 1.100                      | -1.245         |
|       | yeast dough     | 1.154   | 1.224                      | -1.257         |
| Wheat | wholemeal       | 0.616   | 0.893                      | -2.458         |
|       | sourdough bread | 1.205   | 1.036                      | 0.404          |
|       | sourdough dough | 1.309   | 1.132                      | 0.413          |
|       | yeast bread     | 1.051   | 1.170                      | -1.350         |
|       | yeast dough     | 1.052   | 1.179                      | -1.368         |
|       |                 |         |                            |                |
| SEM   |                 | 0.05268 | 0.07239                    | 0.02268        |

**Supplementary Table S4.** p values from ANOVA (A) and tables of means (B) of dietary fibre components and arabinoxylan oligosaccharide ( AXOS) and gluco-oligosaccharide (GOS) fragments determined by enzyme fingerprinting of flour, dough and bread of the three types of wheat.

Further details are given in Statistical Analyses section.

**A. P values**

Statistically significant values (p <0.05) are in bold.

|                                | processed        | type.processed | processed.dough  | type.processed.dough | processed.stage  | type.processed.stage | processed.stage.dough | type.processed.stage.dough |
|--------------------------------|------------------|----------------|------------------|----------------------|------------------|----------------------|-----------------------|----------------------------|
| <b>DF components</b>           |                  |                |                  |                      |                  |                      |                       |                            |
| Klason lignin                  | 0.122            | 0.410          | <b>&lt;0.001</b> | 0.312                | 0.279            | 0.238                | <b>0.018</b>          | 0.197                      |
| Uronic acid residues           | 0.231            | 0.926          | 0.620            | 0.498                | <b>0.001</b>     | 0.089                | 0.463                 | 0.438                      |
| Log arabinose                  | <b>0.002</b>     | 0.706          | <b>0.005</b>     | 0.572                | <b>0.003</b>     | <b>0.014</b>         | 0.311                 | 0.459                      |
| Log xylose                     | <b>0.016</b>     | 0.540          | 0.638            | 0.505                | <b>0.002</b>     | <b>0.019</b>         | 0.540                 | 0.640                      |
| Mannose                        | <b>0.005</b>     | 0.198          | <b>&lt;0.001</b> | 0.439                | 0.137            | 0.301                | 0.931                 | 0.188                      |
| Galactose                      | 0.079            | 0.848          | <b>&lt;0.001</b> | 0.618                | 0.919            | 0.929                | 0.956                 | 0.698                      |
| Sqrt glucose                   | <b>0.055</b>     | 0.916          | <b>&lt;0.001</b> | 0.330                | <b>&lt;0.001</b> | 0.440                | 0.466                 | 0.398                      |
| Log total sugar residues       | 0.166            | 0.759          | <b>0.009</b>     | 0.501                | <b>&lt;0.001</b> | <b>0.023</b>         | 0.478                 | 0.560                      |
| Dietary fibre without fructans | 0.563            | 0.657          | 0.616            | 0.870                | <b>0.002</b>     | 0.058                | 0.469                 | 0.982                      |
| Sqrt fructans                  | <b>&lt;0.001</b> | <b>0.011</b>   | <b>&lt;0.001</b> | 0.227                | <b>&lt;0.001</b> | 0.117                | <b>0.012</b>          | 0.411                      |



|                                         |                  |                  |                  |                  |                  |                  |                  |              |
|-----------------------------------------|------------------|------------------|------------------|------------------|------------------|------------------|------------------|--------------|
| Total dietary fibre (with fructans)     | <b>0.006</b>     | 0.498            | 0.659            | 0.846            | <b>0.009</b>     | <b>0.046</b>     | 0.239            | 0.939        |
| Log arabinoxylan                        | <b>0.019</b>     | 0.598            | 0.228            | 0.522            | <b>0.002</b>     | <b>0.015</b>     | 0.444            | 0.570        |
| Log TOT $\beta$ -glucan                 | <b>&lt;0.001</b> | 0.514            | <b>0.002</b>     | 0.796            | <b>&lt;0.001</b> | <b>0.003</b>     | <b>0.006</b>     | 0.142        |
| <b>AGP</b>                              |                  |                  |                  |                  |                  |                  |                  |              |
| Galactose mg/g                          | <b>&lt;0.001</b> | <b>0.002</b>     | <b>&lt;0.001</b> | <b>&lt;0.001</b> | <b>&lt;0.001</b> | 0.634            | 0.151            | <b>0.008</b> |
| Galactose nMoles/mg                     | <b>&lt;0.001</b> | <b>0.002</b>     | <b>&lt;0.001</b> | <b>&lt;0.001</b> | <b>&lt;0.001</b> | 0.634            | 0.151            | <b>0.008</b> |
| Arabinose mg/g                          | <b>&lt;0.001</b> | 0.536            | <b>0.040</b>     | 0.052            | 0.364            | 0.330            | <b>0.002</b>     | 0.066        |
| Arabinose nMoles/mg                     | <b>&lt;0.001</b> | 0.536            | <b>0.040</b>     | 0.052            | 0.364            | 0.330            | <b>0.002</b>     | 0.066        |
| Ara:Gal                                 | <b>&lt;0.001</b> | <b>0.045</b>     | <b>&lt;0.001</b> | 0.309            | <b>&lt;0.001</b> | <b>0.018</b>     | <b>&lt;0.001</b> | 0.155        |
| <b>AXOS and GOS from fingerprinting</b> |                  |                  |                  |                  |                  |                  |                  |              |
| Log Xylose                              | <b>&lt;0.001</b> | 0.484            | <b>&lt;0.001</b> | 0.215            | <b>&lt;0.001</b> | <b>0.003</b>     | <b>0.031</b>     | 0.179        |
| Sqrt Xyl2                               | <b>&lt;0.001</b> | 0.615            | <b>&lt;0.001</b> | 0.146            | <b>&lt;0.001</b> | <b>0.003</b>     | 0.052            | 0.314        |
| Sqrt Xyl3                               | <b>&lt;0.001</b> | 0.564            | 0.651            | 0.726            | <b>&lt;0.001</b> | <b>&lt;0.001</b> | 0.291            | 0.116        |
| Xyl5                                    | <b>&lt;0.001</b> | <b>&lt;0.001</b> | <b>0.008</b>     | 0.158            | <b>&lt;0.001</b> | 0.309            | 0.155            | 0.176        |
| Log XA3XX                               | <b>&lt;0.001</b> | 0.679            | <b>&lt;0.001</b> | 0.499            | <b>&lt;0.001</b> | <b>0.002</b>     | 0.052            | 0.188        |
| logXA2 + 3XX                            | <b>&lt;0.001</b> | 0.763            | <b>&lt;0.001</b> | 0.689            | <b>0.016</b>     | <b>0.025</b>     | <b>0.044</b>     | 0.651        |
| Log XA3A3XX                             | <b>0.004</b>     | <b>&lt;0.001</b> | <b>&lt;0.001</b> | <b>&lt;0.001</b> | <b>&lt;0.001</b> | <b>&lt;0.001</b> | <b>0.003</b>     | 0.217        |
| Log XA3XA3XX                            | 0.837            | 0.731            | 0.164            | 0.314            | <b>&lt;0.001</b> | <b>0.003</b>     | <b>0.016</b>     | <b>0.035</b> |
| XA3A23XX                                | <b>&lt;0.001</b> | <b>0.004</b>     | <b>0.025</b>     | 0.537            | <b>0.003</b>     | <b>0.049</b>     | <b>0.013</b>     | 0.819        |
| Xa3XA2 + 3XX                            | <b>&lt;0.001</b> | <b>&lt;0.001</b> | <b>0.009</b>     | 0.516            | <b>0.004</b>     | <b>&lt;0.001</b> | <b>0.017</b>     | 0.574        |



|     |             |         |          |         |         |          |          |
|-----|-------------|---------|----------|---------|---------|----------|----------|
| SEM | wholemeal   | 0.06195 | 0.005037 | 0.02331 | 0.03024 | 0.009354 | 0.006267 |
|     | Dough/bread | 0.05058 | 0.004113 | 0.01903 | 0.02469 | 0.007638 | 0.005117 |

|       |                 | Sqrt glucose | Log total sugar residues | Dietary fibre without fructan | Sqrt fructan | Total dietary fibre | Log arabinoxylan |
|-------|-----------------|--------------|--------------------------|-------------------------------|--------------|---------------------|------------------|
| Emmer | wholemeal       | 1.080        | 1.557                    | 5.531                         | 0.8070       | 6.182               | 1.039            |
|       | sourdough bread | 1.210        | 1.547                    | 5.609                         | 0.5022       | 5.861               | 0.910            |
|       | sourdough dough | 0.957        | 1.435                    | 5.256                         | 0.5924       | 5.608               | 0.927            |
|       | yeast bread     | 1.245        | 1.575                    | 5.628                         | 0.3755       | 5.770               | 0.900            |
|       | yeast dough     | 1.029        | 1.497                    | 5.201                         | 0.4467       | 5.401               | 0.953            |
| Spelt | wholemeal       | 1.218        | 1.770                    | 6.734                         | 0.9813       | 7.698               | 1.266            |
|       | sourdough bread | 1.321        | 1.769                    | 6.974                         | 0.5872       | 7.319               | 1.194            |
|       | sourdough dough | 1.107        | 1.666                    | 6.518                         | 0.6602       | 6.955               | 1.178            |
|       | yeast bread     | 1.417        | 1.839                    | 7.227                         | 0.5167       | 7.494               | 1.233            |
|       | yeast dough     | 1.198        | 1.767                    | 6.636                         | 0.5115       | 6.898               | 1.264            |
| Wheat | wholemeal       | 1.367        | 1.979                    | 8.206                         | 1.1105       | 9.439               | 1.482            |
|       | sourdough bread | 1.475        | 1.915                    | 7.774                         | 0.7518       | 8.340               | 1.351            |
|       | sourdough dough | 1.261        | 1.906                    | 7.825                         | 0.8297       | 8.515               | 1.476            |
|       | yeast bread     | 1.531        | 1.959                    | 7.921                         | 0.6397       | 8.330               | 1.371            |
|       | yeast dough     | 1.315        | 1.932                    | 7.829                         | 0.6621       | 8.267               | 1.478            |
|       |                 |              |                          |                               |              |                     |                  |
| SEM   | wholemeal       | 0.01421      | 0.02278                  | 0.1672                        | 0.01833      | 0.1675              | 0.02799          |
|       | Dough/bread     | 0.01160      | 0.01860                  | 0.1365                        | 0.01497      | 0.1367              | 0.02286          |

**Table of means for AGP: galactose equivalents (mg and nMoles/mg dry wt), arabinose equivalents (mg and nMoles/mg dry wt) and ratios.**

|       |                 | Galactose<br>mg/g | Galactose<br>nMoles/mg | Arabinose<br>mg/g | Arabinose<br>nMoles/mg | Ara:Gal |
|-------|-----------------|-------------------|------------------------|-------------------|------------------------|---------|
| Emmer | wholemeal       | 1.120             | 6.22                   | 0.922             | 6.14                   | 0.988   |
|       | sourdough bread | 1.985             | 11.03                  | 1.925             | 12.82                  | 1.175   |
|       | sourdough dough | 2.441             | 13.56                  | 2.387             | 15.90                  | 1.172   |
|       | yeast bread     | 1.412             | 7.84                   | 2.229             | 14.85                  | 1.891   |
|       | yeast dough     | 1.507             | 8.37                   | 1.806             | 12.03                  | 1.435   |
| Spelt | wholemeal       | 1.104             | 6.13                   | 0.883             | 5.88                   | 0.959   |
|       | sourdough bread | 2.753             | 15.29                  | 2.058             | 13.71                  | 0.896   |
|       | sourdough dough | 3.074             | 17.08                  | 2.472             | 16.46                  | 0.965   |
|       | yeast bread     | 1.681             | 9.34                   | 1.885             | 12.56                  | 1.344   |
|       | yeast dough     | 1.789             | 9.94                   | 1.848             | 12.31                  | 1.240   |
| Wheat | wholemeal       | 0.996             | 5.53                   | 0.738             | 4.91                   | 0.888   |
|       | sourdough bread | 2.268             | 12.60                  | 1.687             | 11.24                  | 0.891   |
|       | sourdough dough | 2.431             | 13.50                  | 1.703             | 11.34                  | 0.837   |
|       | yeast bread     | 1.576             | 8.76                   | 1.801             | 12.00                  | 1.370   |
|       | yeast dough     | 1.997             | 11.10                  | 1.715             | 11.42                  | 1.030   |
|       |                 |                   |                        |                   |                        |         |
| SEM   |                 | 0.05959           | 0.3311                 | 0.1057            | 0.7038                 | 0.04765 |

**Tables of means for oligosaccharide (AXOS) and gluco-oligosaccharide (GOS) fragments determined by enzyme fingerprinting (arbitrary units) and ratios of WE-xylose:TOT-xylose, TOT-arabinoxylan (AX) to  $\beta$ -glucan and ratio of G3:G4 GOS fragments.**

|       |                 | Log Xylose | sqrtXyl2 | sqrtXyl3 | Xyl5    | Log XA3XX | Log XA2 + 3XX | logXA3A3XX |
|-------|-----------------|------------|----------|----------|---------|-----------|---------------|------------|
| Emmer | wholemeal       | 1.268      | 2.210    | 0.7306   | 0.24773 | 0.4706    | -0.0003       | -0.9869    |
|       | sourdough bread | 0.911      | 1.696    | 0.3053   | 0.04236 | 0.1015    | -0.2583       | -0.6668    |
|       | sourdough dough | 1.180      | 1.965    | 0.4540   | 0.01771 | 0.1927    | -0.2649       | -0.7985    |
|       | yeast bread     | 0.841      | 1.649    | 0.3396   | 0.04131 | 0.0736    | -0.3324       | -0.9405    |
|       | yeast dough     | 0.878      | 1.693    | 0.4701   | 0.01806 | 0.0171    | -0.4074       | -1.1407    |
| Spelt | wholemeal       | 1.529      | 2.454    | 0.8703   | 0.31878 | 0.7490    | 0.1300        | -0.7738    |
|       | sourdough bread | 1.179      | 1.949    | 0.4076   | 0.06228 | 0.3570    | -0.1864       | -0.9056    |
|       | sourdough dough | 1.578      | 2.422    | 0.6993   | 0.03294 | 0.6124    | 0.0145        | -0.8869    |
|       | yeast bread     | 0.991      | 1.801    | 0.3992   | 0.05726 | 0.2816    | -0.2476       | -0.8800    |
|       | yeast dough     | 1.233      | 2.059    | 0.6789   | 0.02751 | 0.3959    | -0.2147       | -1.0044    |
| Wheat | wholemeal       | 1.733      | 2.637    | 0.9817   | 0.2337  | 1.0309    | 0.5023        | -0.4127    |
|       | sourdough bread | 1.303      | 2.064    | 0.4371   | 0.06192 | 0.5757    | 0.1995        | -0.6859    |

|     |                 |         |         |         |          |         |         |         |
|-----|-----------------|---------|---------|---------|----------|---------|---------|---------|
|     | sourdough dough | 1.726   | 2.576   | 0.7361  | 0.01747  | 0.8148  | 0.3608  | -0.6572 |
|     | yeast bread     | 1.015   | 1.753   | 0.3913  | 0.04463  | 0.4715  | 0.1278  | -0.6223 |
|     | yeast dough     | 1.451   | 2.272   | 0.8199  | 0.02171  | 0.7355  | 0.2088  | -0.6365 |
|     |                 |         |         |         |          |         |         |         |
| SEM |                 | 0.04437 | 0.05809 | 0.02598 | 0.004287 | 0.03525 | 0.04074 | 0.01973 |

|       |                 | Log<br>XA3XA3XX | XA3A23XX | XA3XA2<br>+ 3XX | G3 GOS | Sqrt G4<br>GOS | Log Sum<br>AX peaks | Log G3 +<br>G4 GOS |
|-------|-----------------|-----------------|----------|-----------------|--------|----------------|---------------------|--------------------|
| Emmer | wholemeal       | -2.431          | 0.2359   | 0.4218          | 2.455  | 1.0243         | 2.560               | 1.2532             |
|       | sourdough bread | -2.340          | 0.1631   | 0.3845          | 1.134  | 0.6433         | 2.144               | 0.4349             |
|       | sourdough dough | -2.505          | 0.1699   | 0.3780          | 1.384  | 0.7243         | 2.342               | 0.6463             |
|       | yeast bread     | -2.169          | 0.1532   | 0.4288          | 1.386  | 0.7434         | 2.089               | 0.6618             |
|       | yeast dough     | -2.638          | 0.1473   | 0.3785          | 1.337  | 0.7126         | 2.093               | 0.6122             |
| Spelt | wholemeal       | -2.297          | 0.2630   | 0.4974          | 3.187  | 1.2080         | 2.791               | 1.5358             |
|       | sourdough bread | -2.230          | 0.1606   | 0.3310          | 1.484  | 0.7525         | 2.355               | 0.7157             |
|       | sourdough dough | -2.368          | 0.1833   | 0.3953          | 2.047  | 0.8541         | 2.719               | 1.0188             |
|       | yeast bread     | -2.207          | 0.1663   | 0.3972          | 1.711  | 0.5848         | 2.235               | 0.8915             |

|       |                 |         |          |         |         |         |         |         |
|-------|-----------------|---------|----------|---------|---------|---------|---------|---------|
|       | yeast dough     | -2.533  | 0.1672   | 0.4090  | 1.893   | 0.8778  | 2.439   | 0.9774  |
| Wheat | wholemeal       | -2.078  | 0.3555   | 0.5686  | 3.128   | 1.1443  | 2.995   | 1.1901  |
|       | sourdough bread | -2.009  | 0.2221   | 0.3725  | 1.266   | 0.6872  | 2.520   | 0.5520  |
|       | sourdough dough | -2.082  | 0.2507   | 0.4440  | 1.858   | 0.7890  | 2.881   | 0.9064  |
|       | yeast bread     | -2.103  | 0.2212   | 0.3979  | 1.376   | 0.7522  | 2.308   | 0.6635  |
|       | yeast dough     | -2.112  | 0.2335   | 0.4518  | 1.973   | 0.8722  | 2.692   | 1.0017  |
|       |                 |         |          |         |         |         |         |         |
| SEM   |                 | 0.04437 | 0.005071 | 0.01194 | 0.07535 | 0.01824 | 0.04321 | 0.04303 |

|       |                 | Log ratio WE-xylose:<br>TOT-xylose | Log (ratio total AX:total $\beta$ -glucan) | Log ratio G3:G4<br>GOS | Sqrt Fructan content | Log Fructan DP |
|-------|-----------------|------------------------------------|--------------------------------------------|------------------------|----------------------|----------------|
| Emmer | wholemeal       | -2.424                             | 1.307                                      | 0.8497                 | 0.8014               | 3.373          |
|       | sourdough bread | -1.120                             | 1.710                                      | 1.0068                 | 0.5022               | 3.291          |
|       | sourdough dough | -1.275                             | 1.696                                      | 0.9699                 | 0.5934               | 2.506          |
|       | yeast bread     | -1.681                             | 1.427                                      | 0.9196                 | 0.3755               | 2.151          |
|       | yeast dough     | -1.629                             | 1.481                                      | 0.9682                 | 0.4467               | 2.415          |

|       |                 |        |         |         |         |        |
|-------|-----------------|--------|---------|---------|---------|--------|
| Spelt | wholemeal       | -2.223 | 1.255   | 0.7810  | 0.9880  | 3.854  |
|       | sourdough bread | -1.150 | 1.639   | 0.9621  | 0.5872  | 4.000  |
|       | sourdough dough | -0.903 | 1.700   | 1.0299  | 0.6602  | 3.649  |
|       | yeast bread     | -13.90 | 1.344   | 0.8502  | 0.5167  | 3.645  |
|       | yeast dough     | -1.432 | 1.461   | 0.8972  | 0.5115  | 3.927  |
| Wheat | wholemeal       | -2.156 | 1.505   | 0.8710  | 1.1094  | 4.628  |
|       | sourdough bread | -1.302 | 1.968   | 0.9858  | 0.7518  | 4.704  |
|       | sourdough dough | -0.961 | 1.975   | 1.0935  | 0.8297  | 4.461  |
|       | yeast bread     | -1.521 | 1.644   | 0.8886  | 0.6397  | 4.844  |
|       | yeast dough     | -1.591 | 1.690   | 0.9513  | 0.6621  | 5.177  |
|       |                 |        |         |         |         |        |
| SEM   |                 | 0.1147 | 0.01351 | 0.01418 | 0.01497 | 0.2424 |



**Figure S1:** loaves baked from the emmer, spelt and bread wheat flours using yeast and sourdough (SD) systems

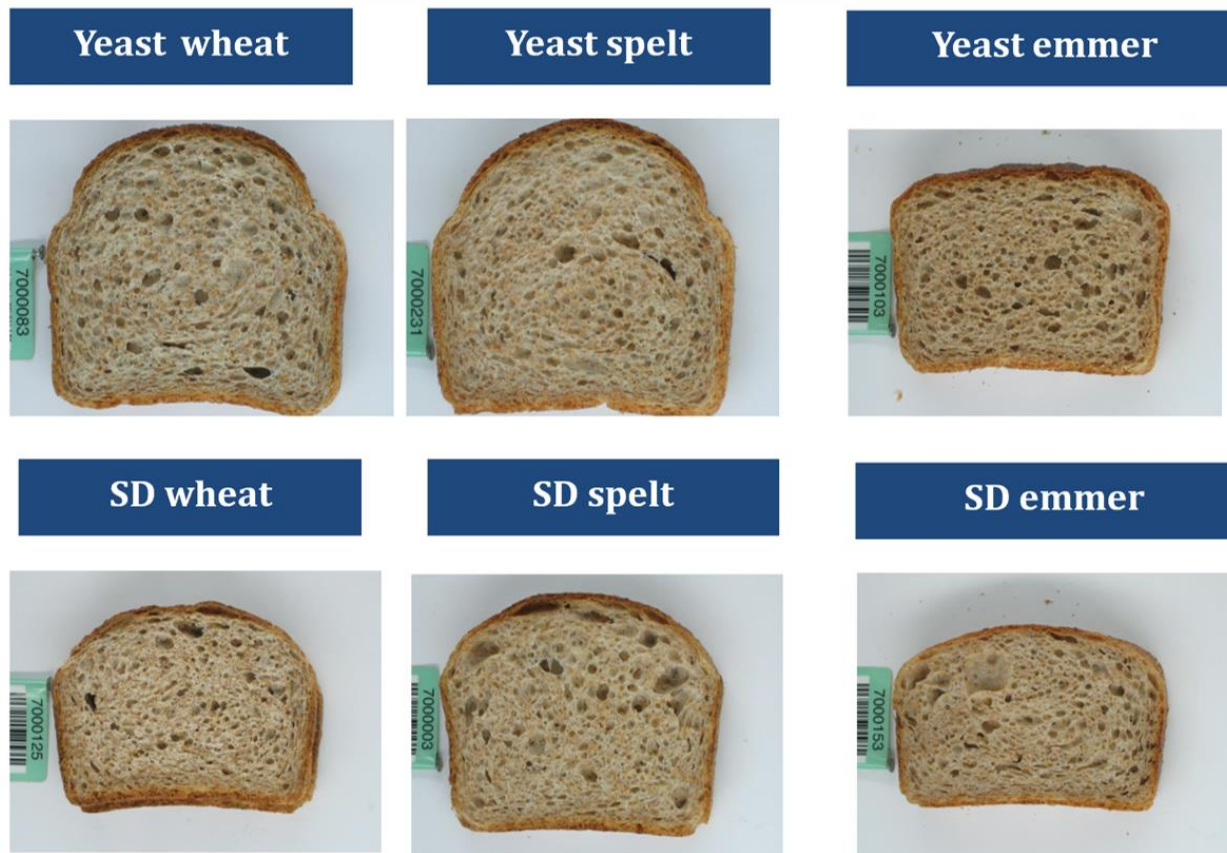

**Figure S2.** The contents of amino acids in the flour, dough and bread samples determined by  $^1\text{H}$  NMR spectroscopy. The points are the values from three replicate analyses as described in the text.

AAsummed is combined amounts of all amino acids; Grainmix if the whole meal flours from the blended grains; GABA is  $\gamma$ -amino butyric acid.

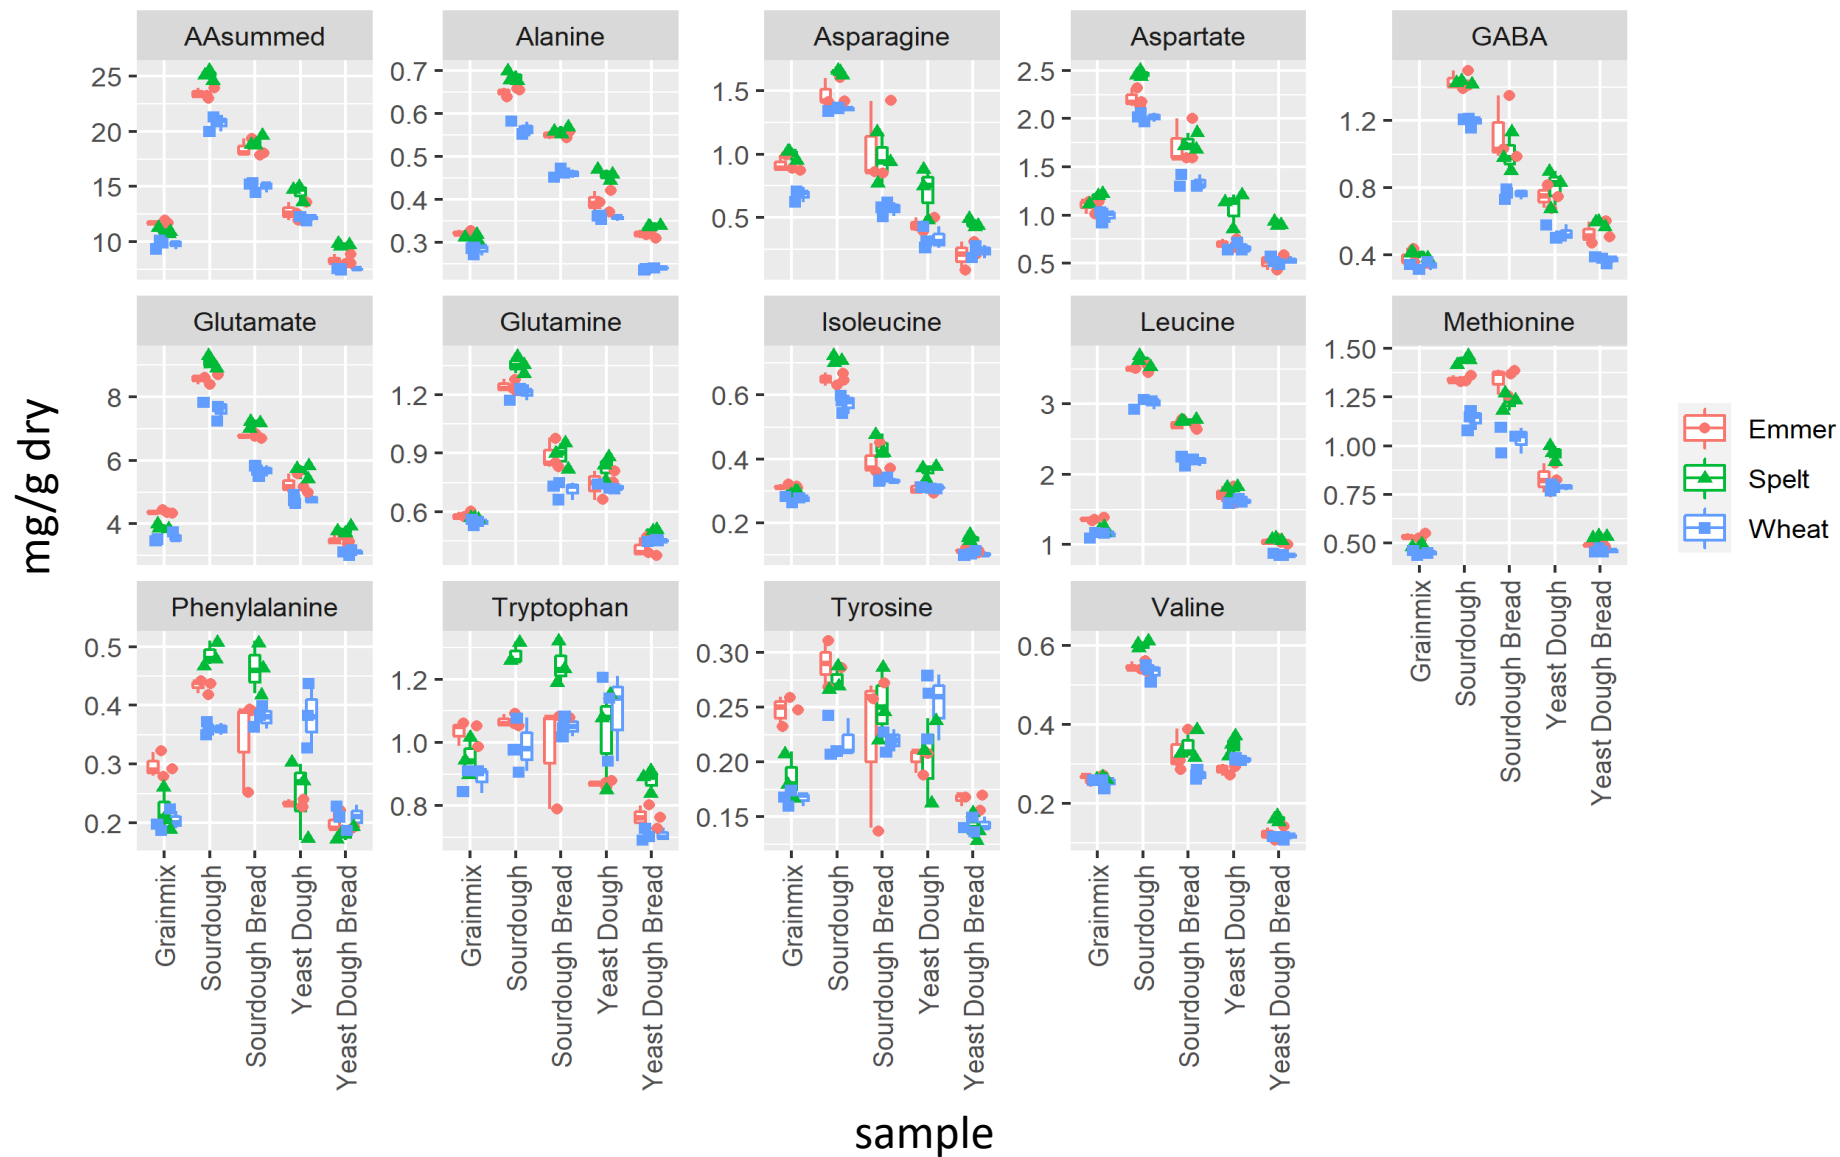

**Figure S3.** The contents of organic acids in the flour, dough and bread samples determined by  $^1\text{H}$  NMR spectroscopy (A) and mass spectrometry (B). The points are the values from three replicate analyses as described in the text. AcidsNMR summed is combined amounts of all organic acids; Grainmix if the whole meal flours from the blended grains

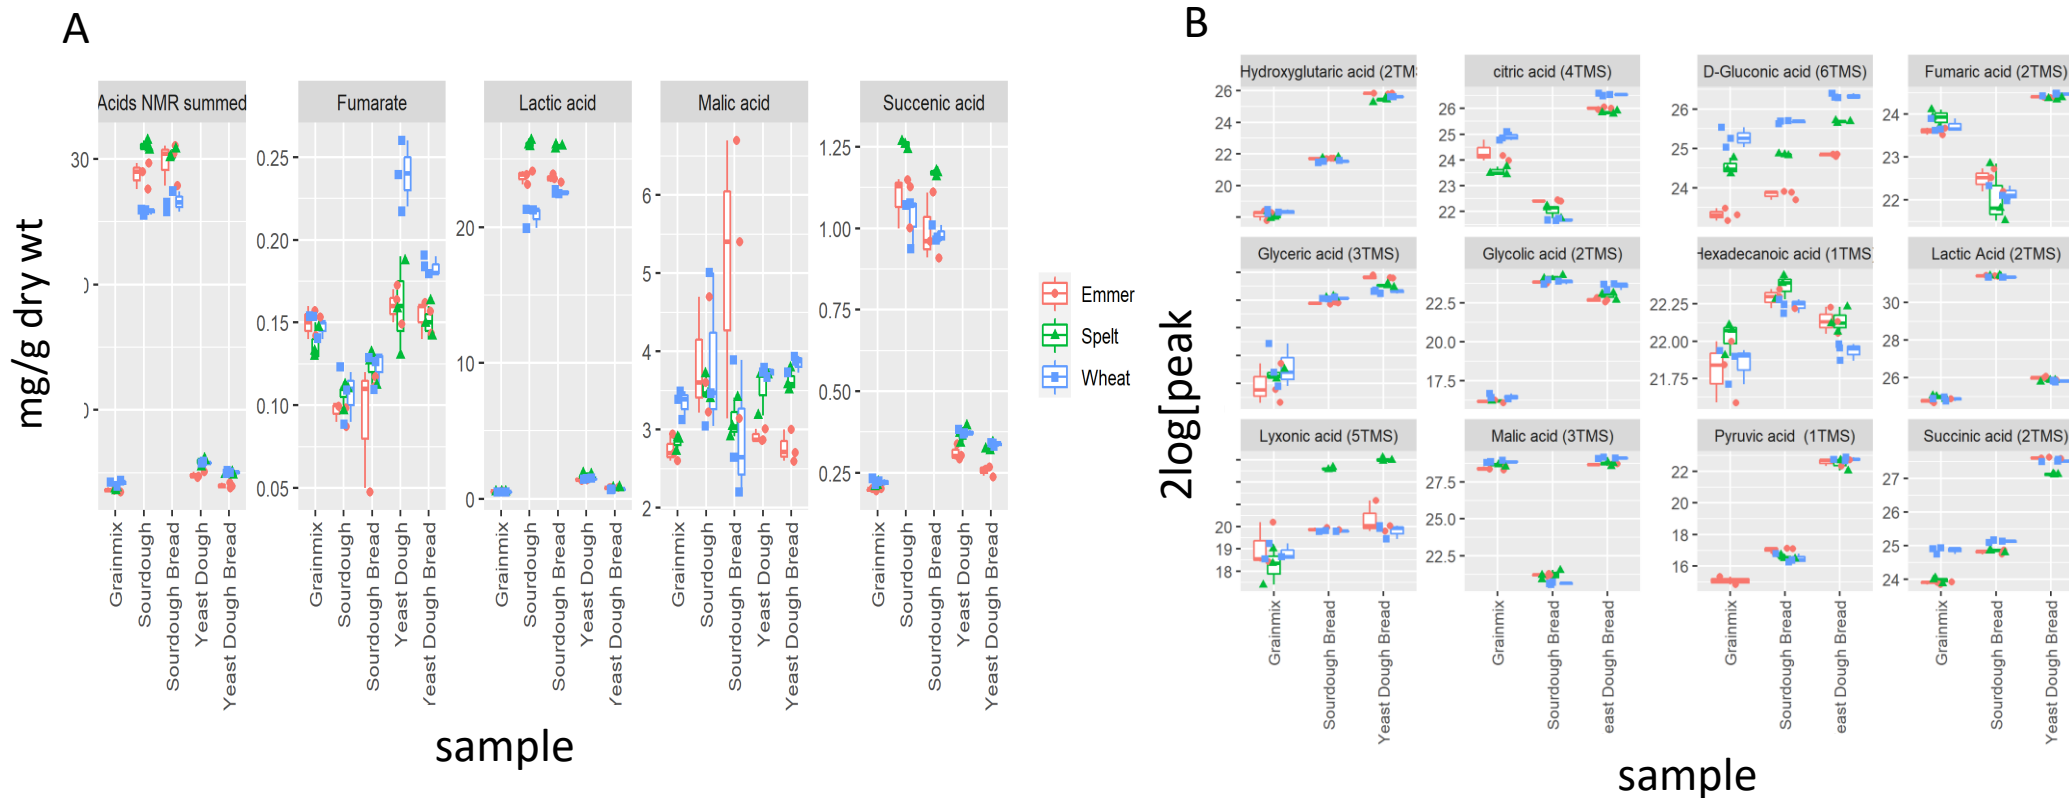

**Figure S4.** The contents of sugars in the flour, dough and bread samples determined by  $^1\text{H}$  NMR spectroscopy. The points are the values from three replicate analyses as described in the text.

Sugar summed is combined amounts of all sugars; Grainmix if the whole meal flours from the blended grains

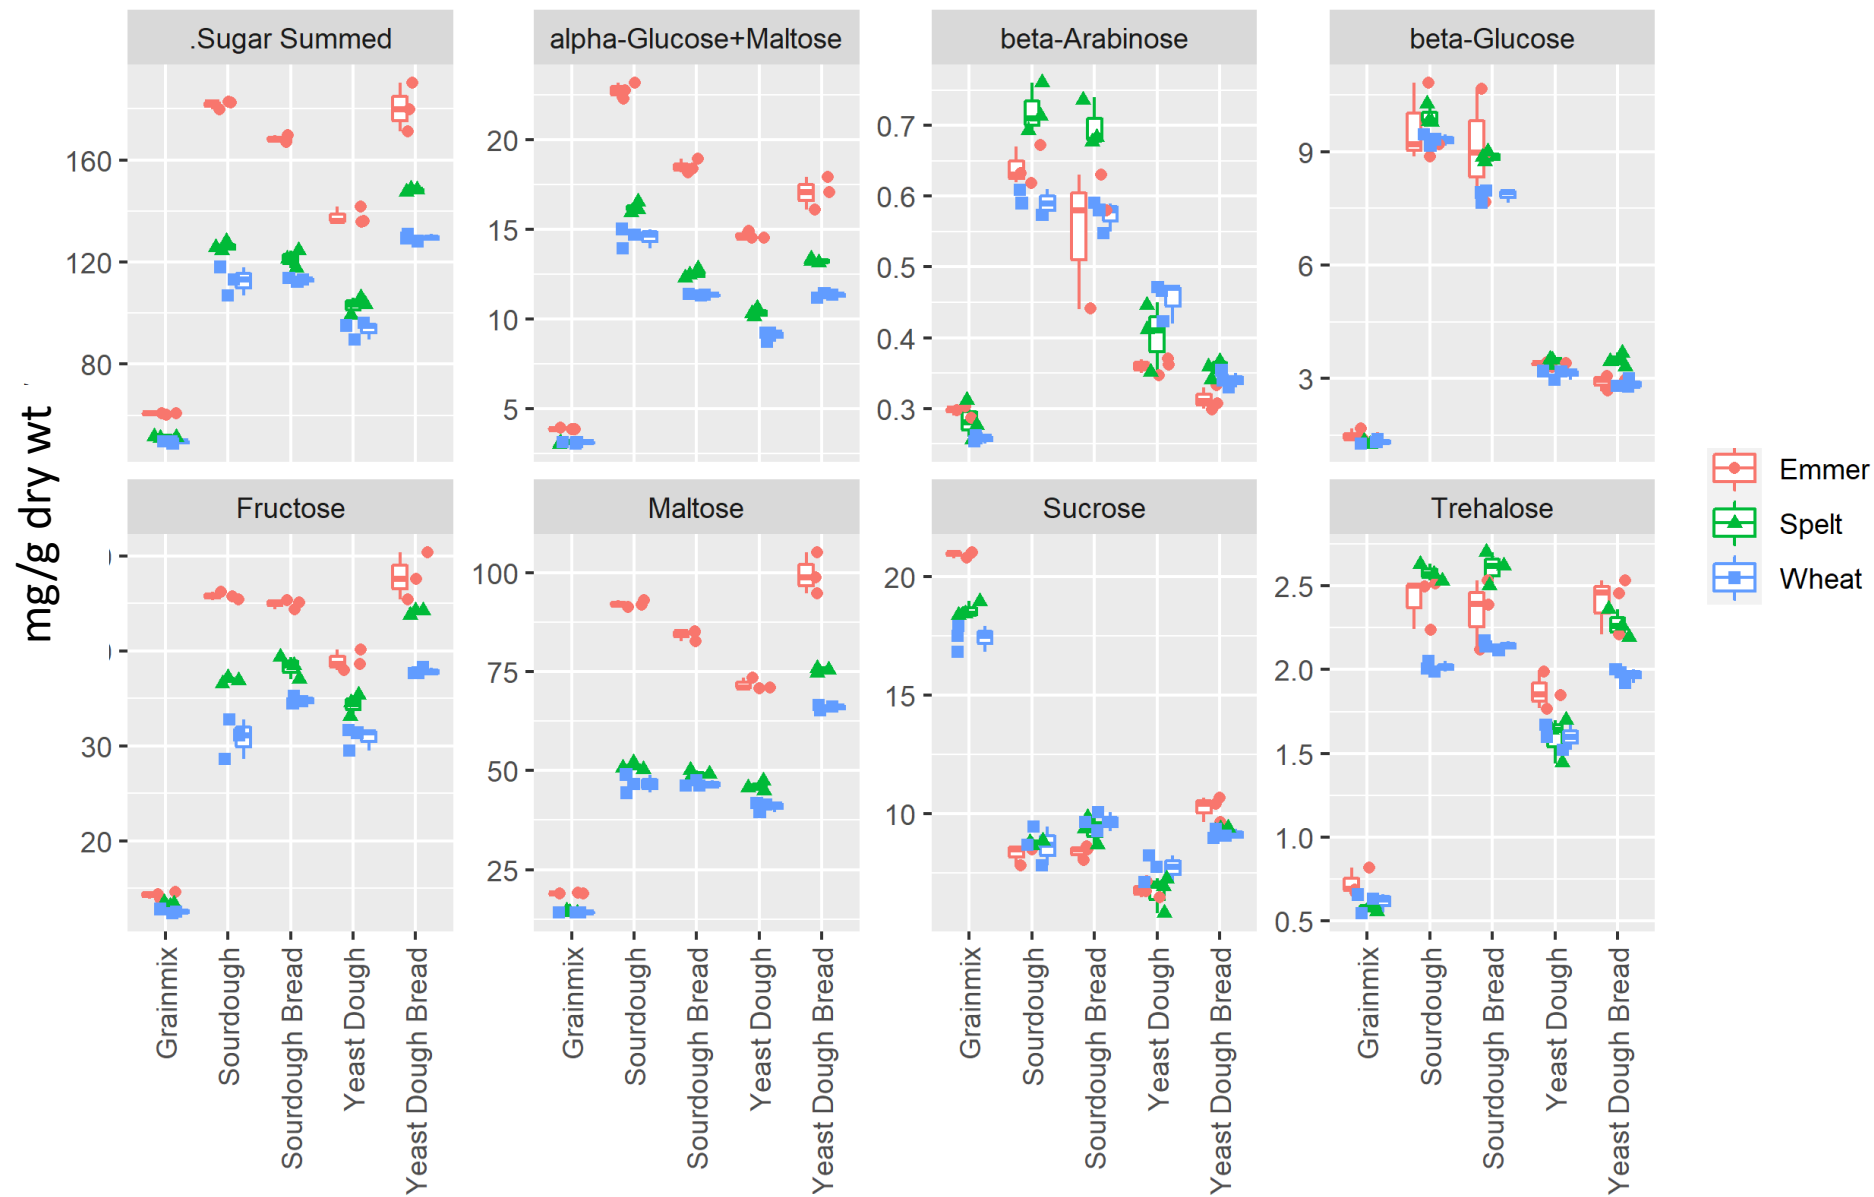

**Figure S5.** The contents of methyl donors in the flour, dough and bread samples determined by  $^1\text{H}$  NMR spectroscopy. The points are the values from three replicate analyses as described in the text.

Methyl donors summed is combined amounts of all methyl donors; Grainmix is the whole meal flours from the blended grains.

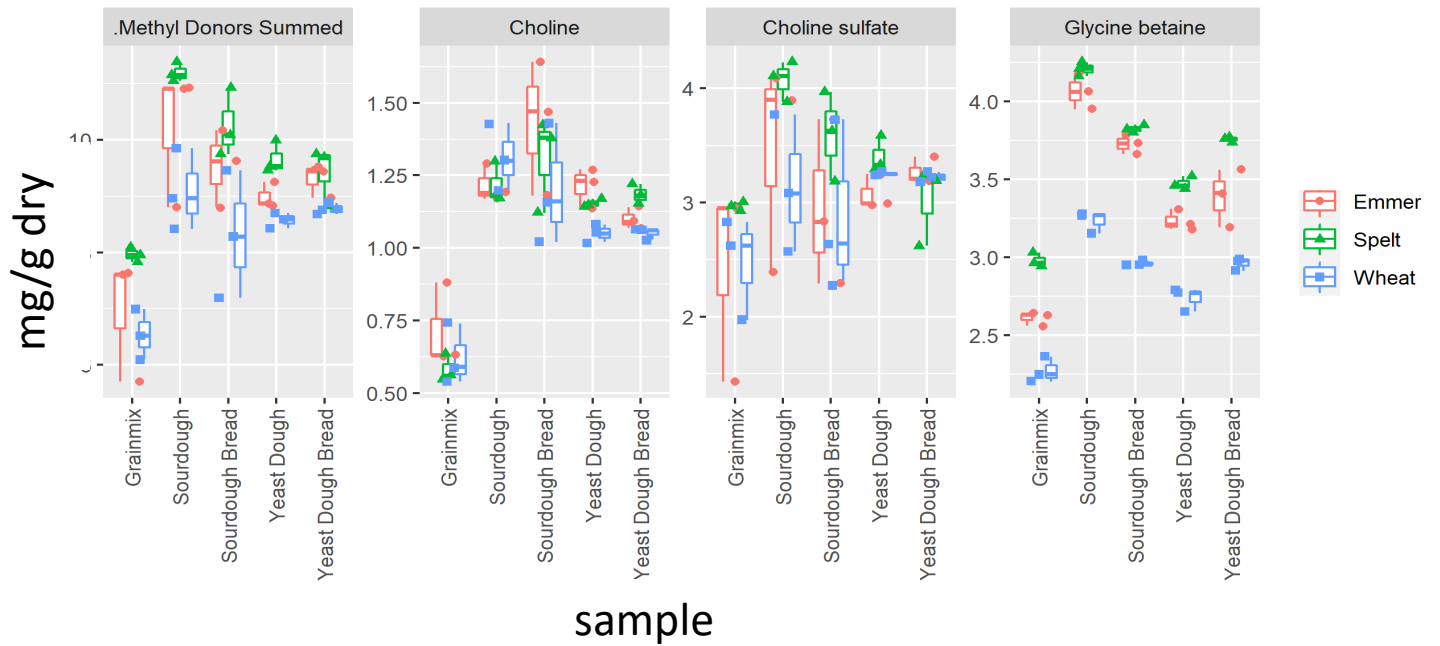

**Figure S6.** Contents of sugar alcohols in flour, dough and bread samples determined by mass spectrometry.

The points are the values from three replicate analyses as described in the text. Grainmix is the whole meal flours from the blended grains.

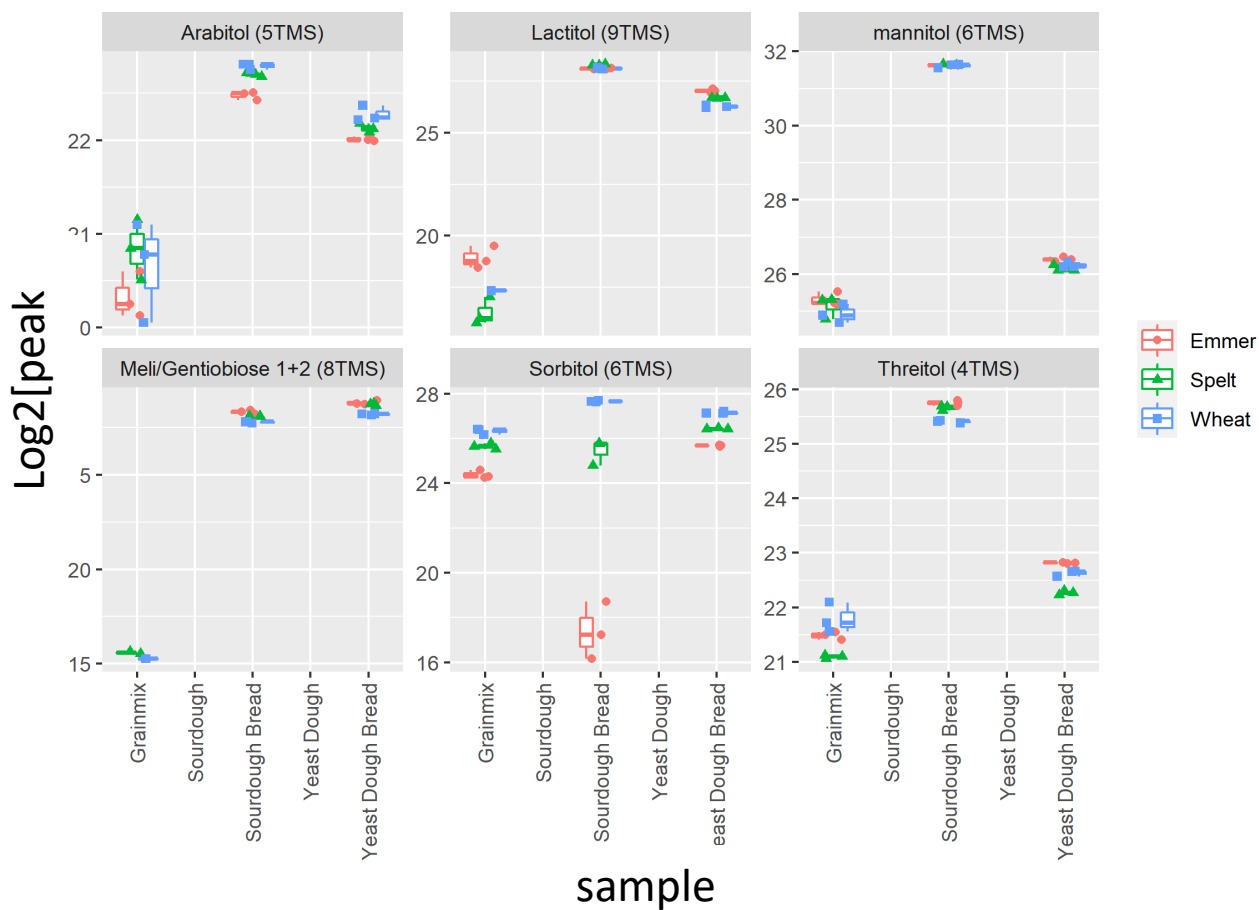

**Figure S7.** Contents of dietary fibre components in flours, dough and bread samples. Sugar residues and uronic acid were determined after hydrolysis and combined with Klason lignin and fructans to give total dietary fibre (TDF). Arabinoxylan is calculated from arabinose, xylose and galactose residue values assuming that the arabinose to xylose ratio was 0.69 in arabinogalactan. The points are the values from three replicate analyses as described in the text. Grainmix is the whole meal flours from the blended grains.

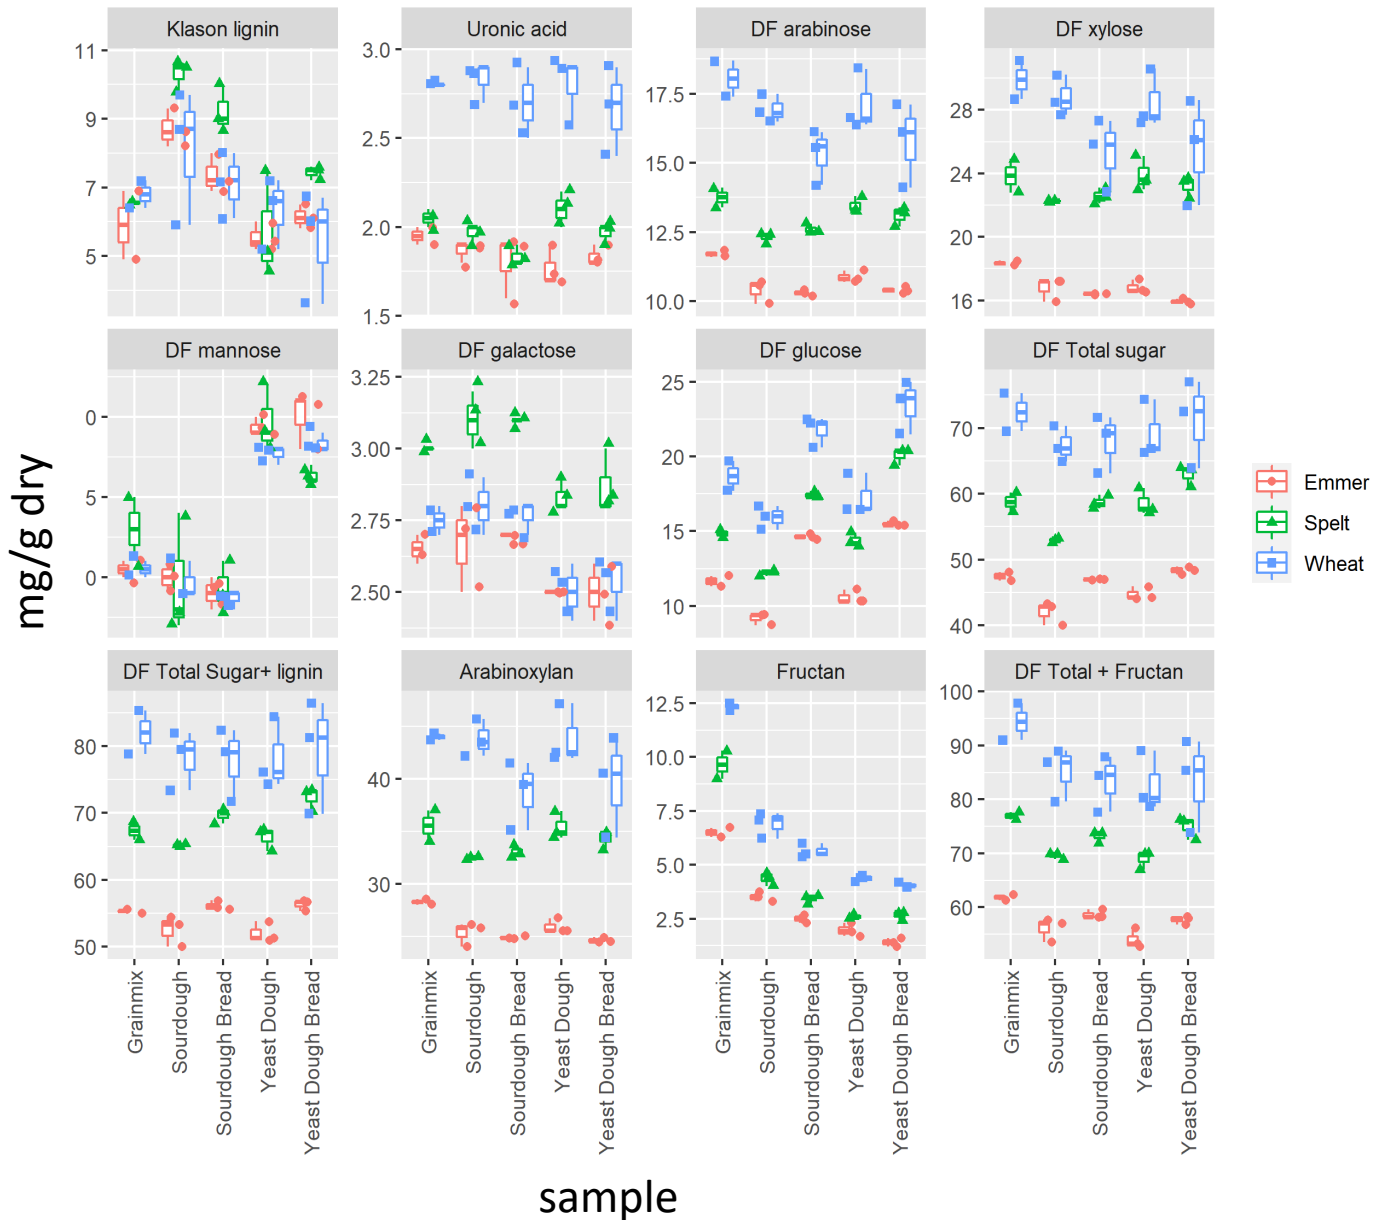

**Figure S8.** Content of arabinogalactose peptide (AGP) in the flour, dough and bread samples determined by  $^1\text{H}$  NMR spectroscopy expressed as arabinose (Arab) and galactose (Gal) equivalents and the ratio of these two values.

The points are the values from three replicate analyses as described in the text. Grainmix is the whole meal flours from the blended grains.

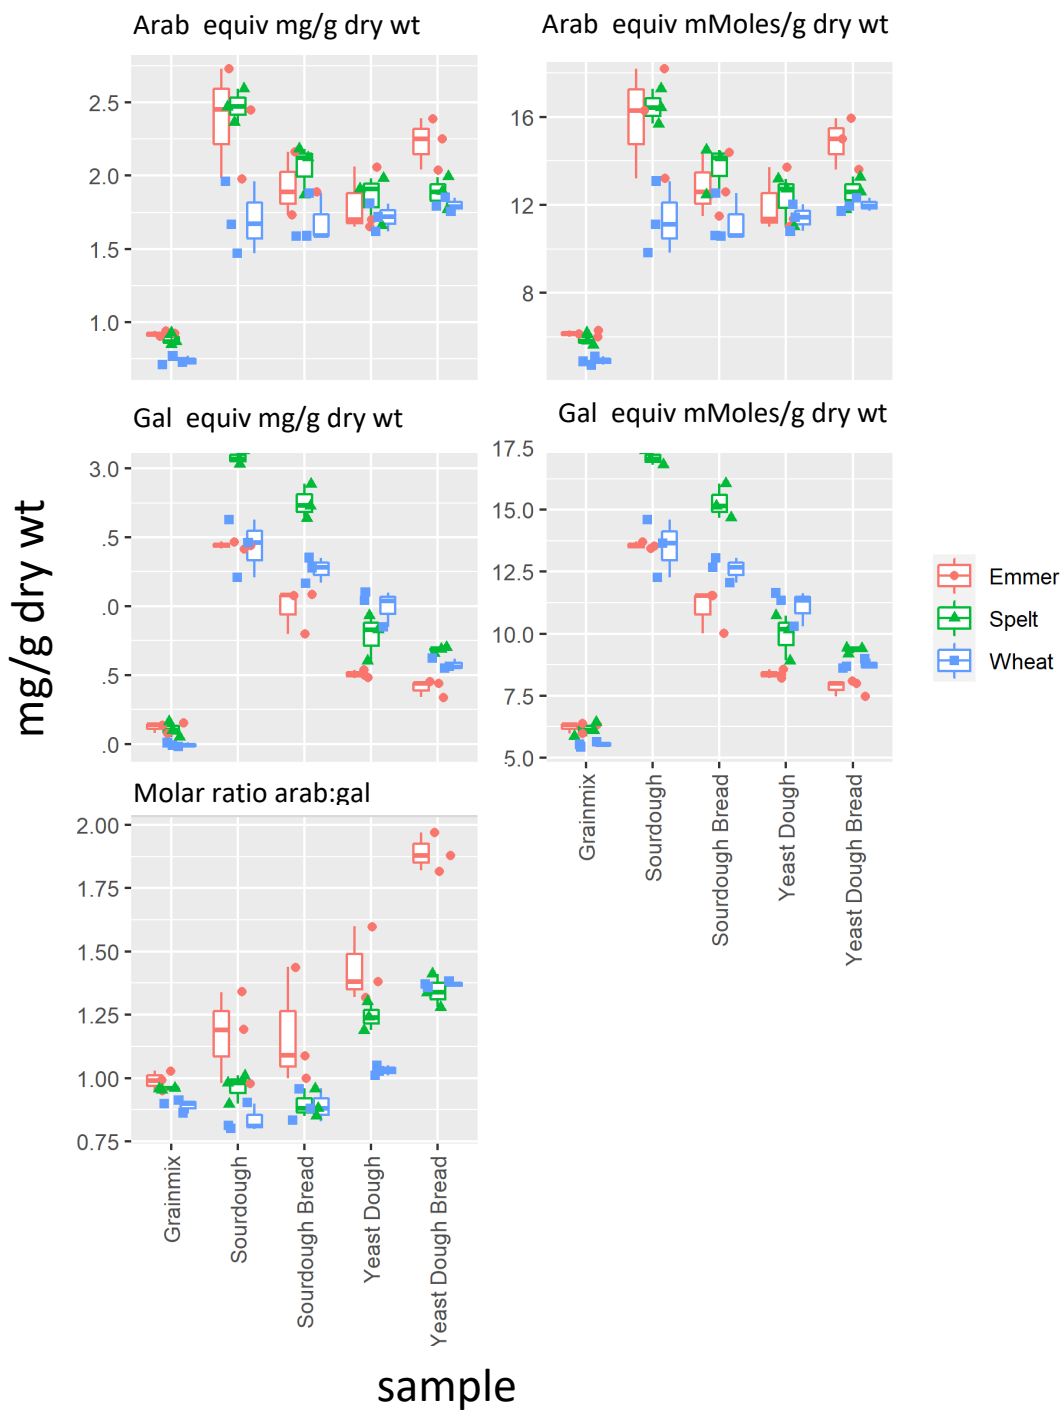



**Figure S9.** Proportions of oligosaccharides released from enzyme digestion of arabinoxylan (AXOS) and  $\beta$ -glucan (G3 and G4 GOS).

Grainmix is the whole meal flours from the blended grains. Xyl2, Xyl3 and Xyl5 comprise 2, 3 and 5 xylose residues, respectively. X indicates a xylose residue, A3 and A2+3 are xylose residues substituted with arabinose at position 3 and positions 3+4, respectively. G3 and G4 GOS comprise 3 and 4 glucose residues, respectively.

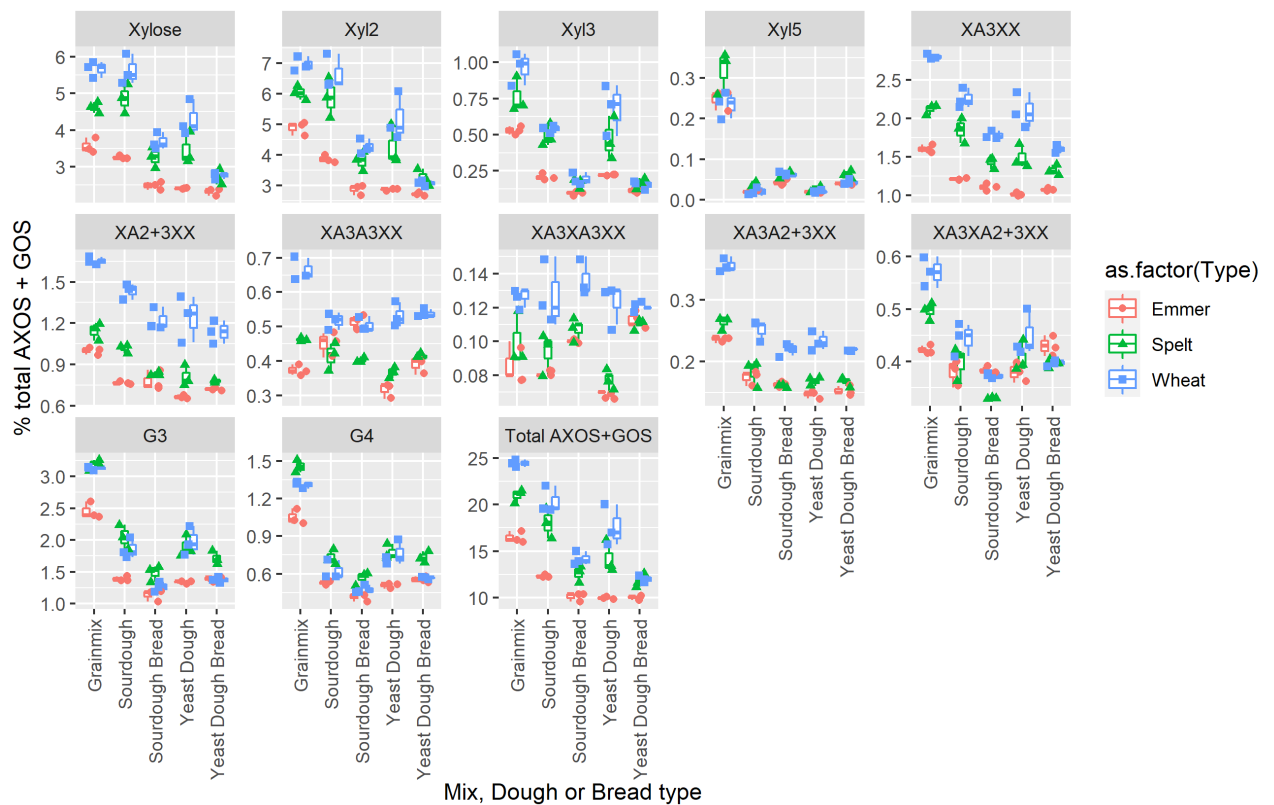

Supplement: mmc1.pdf [file mmc1.pdf]
